# Supplementary material
Source: bioRxiv or medRxiv preprint supplement (https://medrxiv.org/highwire/filestream/69397/field_highwire_adjunct_files/0/19008078-1.pdf)

## Supplementary Information

### Setting Standards to Promote Artificial Intelligence in Colon 2 Mass Endoscopic Sampling

Supplement figure.1-4 are images taken by the Seventh Affiliated Hospital of Sun Yat-sen University, Pucheng County Hospital of Traditional Chinese Medicine, Tongxiang First People's Hospital and Zhejiang Provincial People's, which strictly accords with the sampling standards.

Supplement figure.1

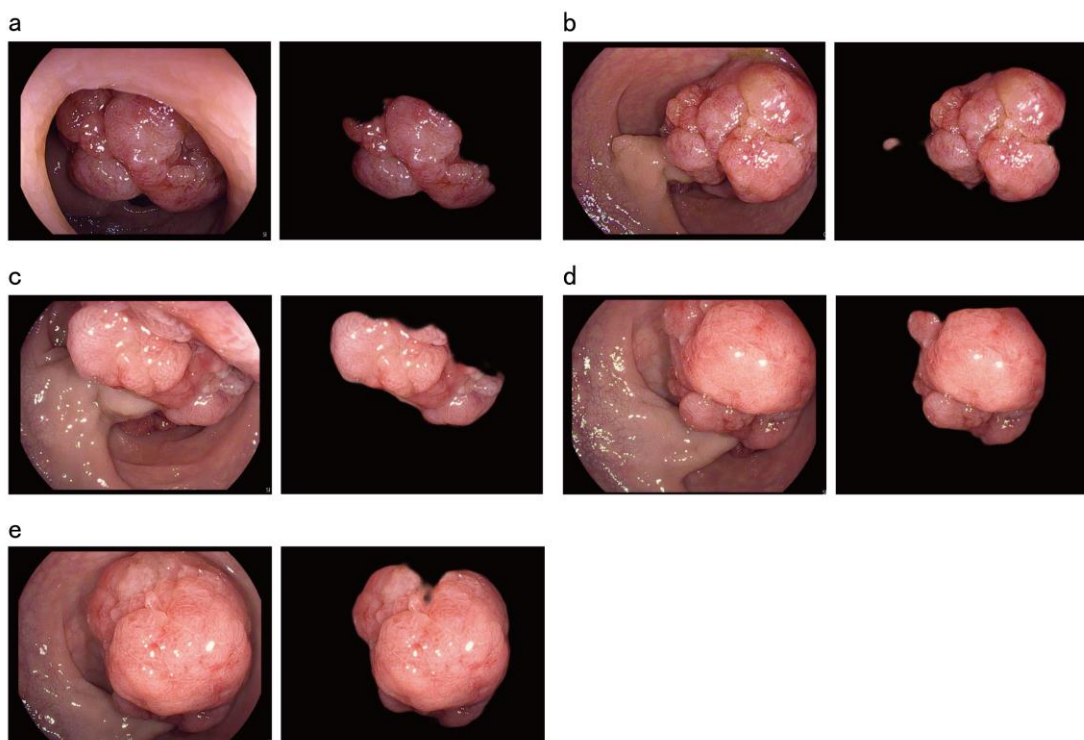

Supplement figure.2

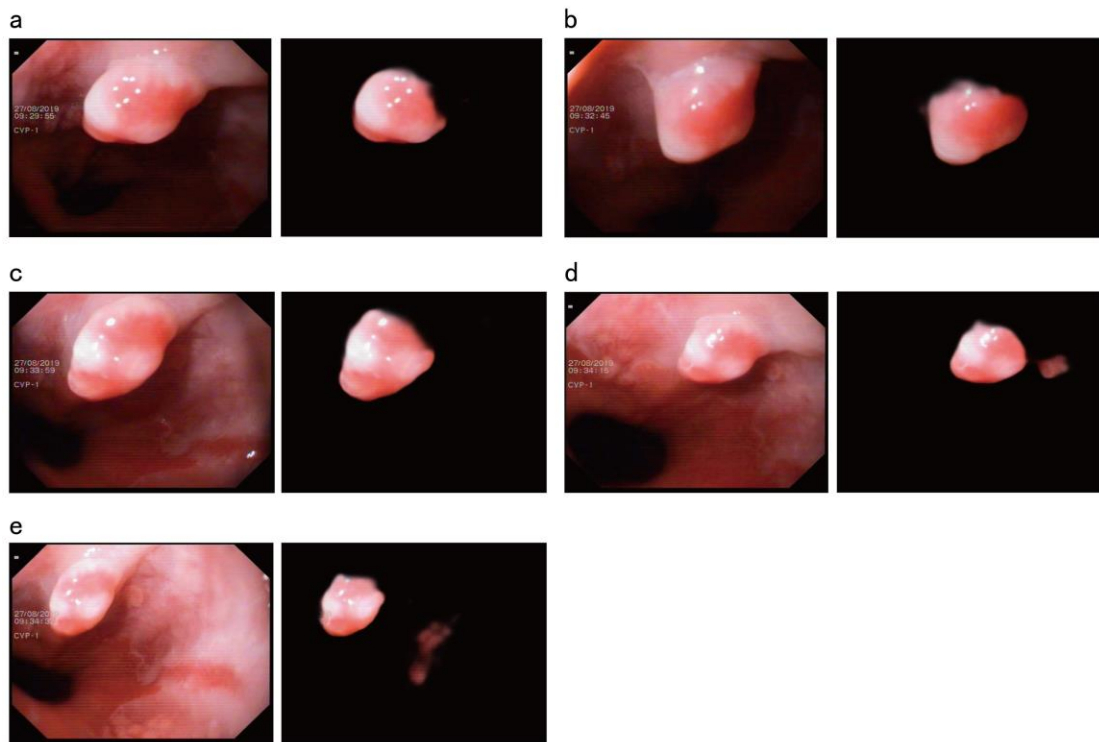

Supplement figure.3

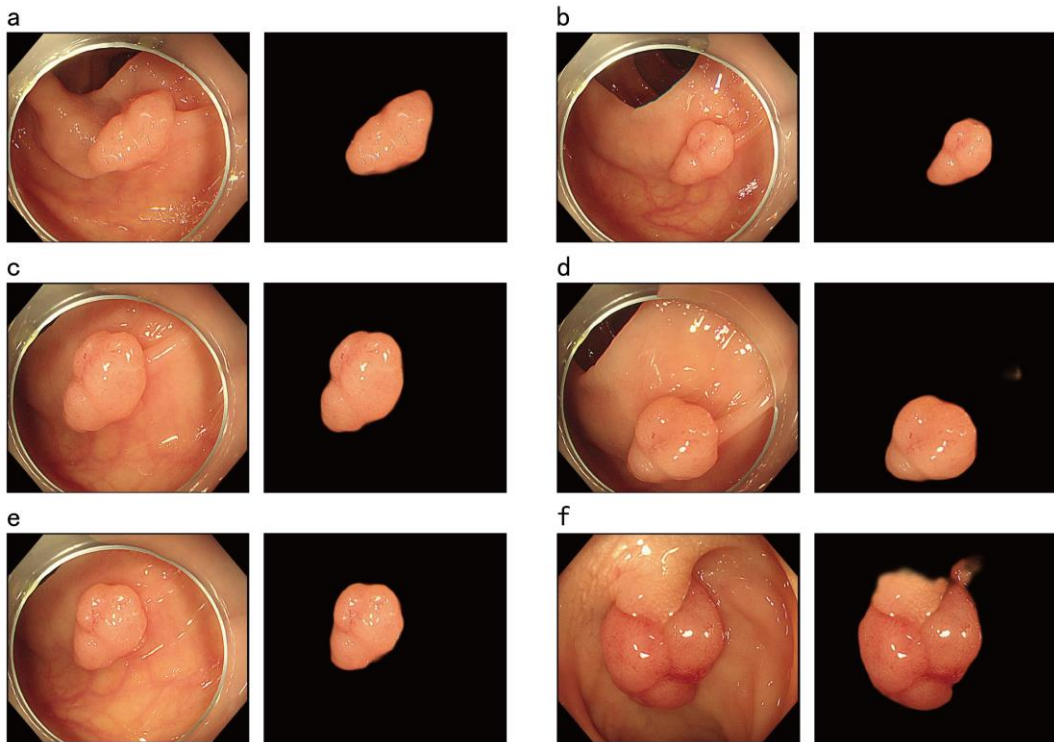

Supplement figure.4

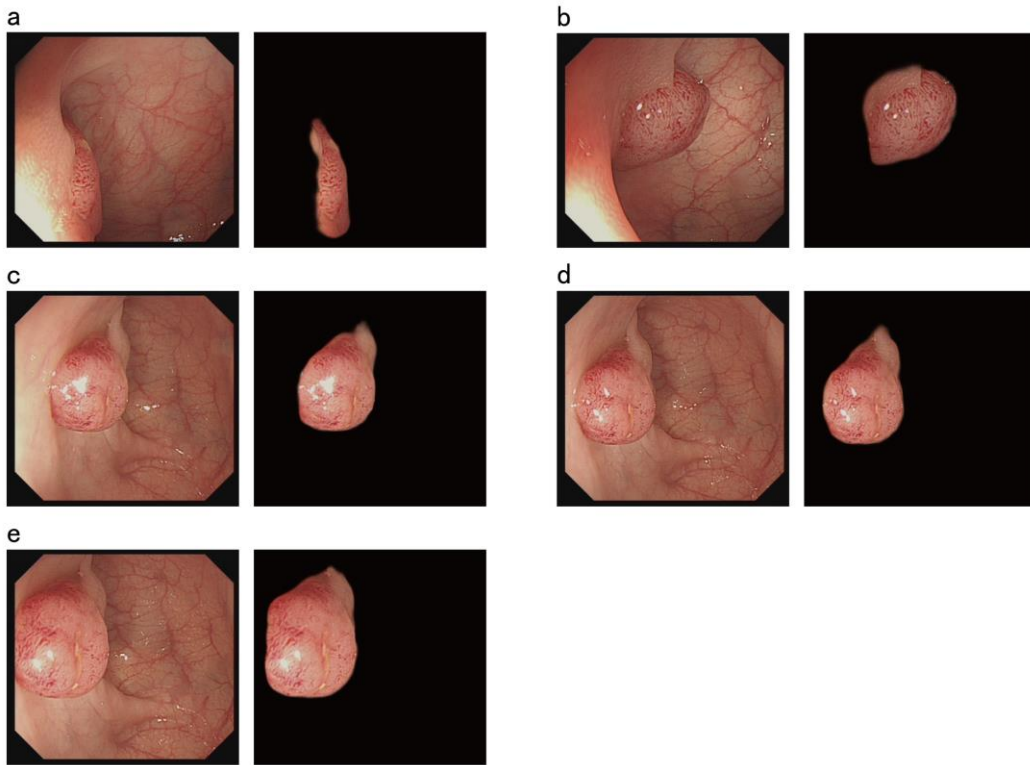

Supplement: Supplementary file [file 19008078-1.pdf]
